# Supplementary material for: Predicting the Effect of Single Mutations on Protein Stability and Binding with Respect to Types of Mutations
Source: MDPI journal article supplement (doi:10.3390/ijms241512073), 2023-07-28
Supplement: s1 [file s1]

# **Predicting the effect of single mutations on protein stability and binding with respect to types of mutations**

**Preeti Pandey<sup>1</sup>, Shailesh Kumar Panday<sup>1</sup>, Prawin Rimal<sup>1</sup>, Nicolas Ancona<sup>2</sup>, Emil Alexov<sup>1,\*</sup>**

<sup>1</sup> Department of Physics and Astronomy, Clemson University, Clemson, SC 29634

<sup>2</sup> Department of Biological Sciences, Clemson University, Clemson, SC 29634

\* Correspondance: [ealexov@clemson.edu](mailto:ealexov@clemson.edu)

## Supplementary Figures

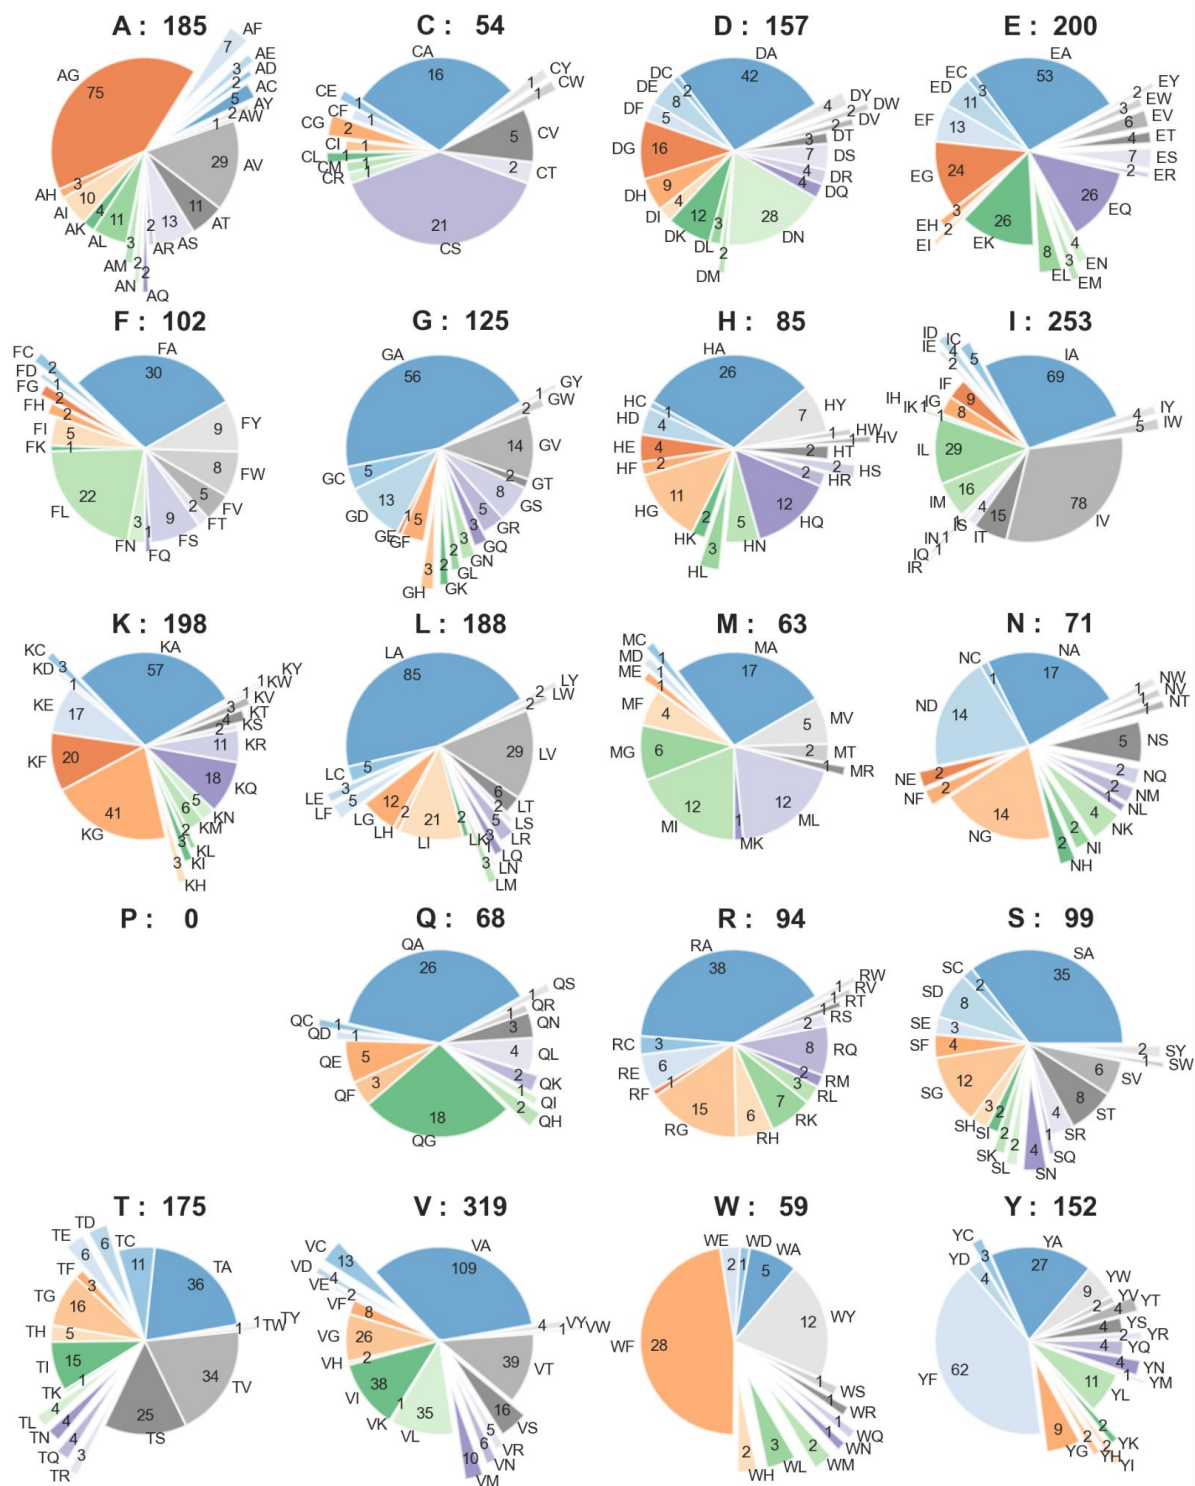

**Figure S1a.** Pie-chart summarizing count of different amino acid mutations in the S2648 dataset. In each subplot, the title shows the wild-type amino acids followed by their count in the whole dataset, and the two-letter label of every pie denotes the one-letter codes of the wild-type and mutant amino acid pair, respectively.



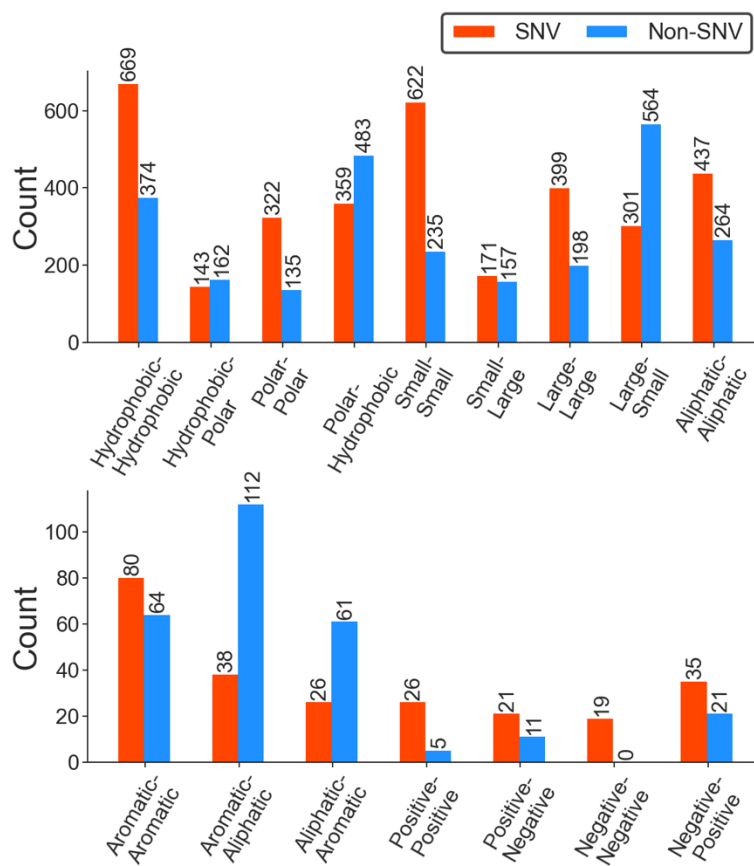

**Figure S1c.** SNV *vs* non-SNV mutations is assigned according to the property of amino acid mutation in the S2648 dataset. The two-word label of bars in the plot represents the amino acid properties of wild-type and mutant residues pairs, respectively. The amino acids according to their properties are categorized as follows: Ala, Cys, Gly, Ile, Leu, Met, Phe, Pro, Trp, and Val are categorized as hydrophobic. Asp, Glu, Lys, Arg, His, Asn, Gln, Ser, Thr, and Tyr are categorized as polar. His, Phe, Trp, and Tyr as aromatic. Ala, Ile, Lys, Leu, Met, Pro, and Val as aliphatic. His, Lys, Arg as positive. Asp, and Glu as negative. Ala, Cys, Gly, Ser, Asn, Asp, Pro, Thr, and Val as small. And Arg, Gln, Glu, His, Ile, Leu, Lys, Met, Phe, Trp, and Tyr as large amino acids.

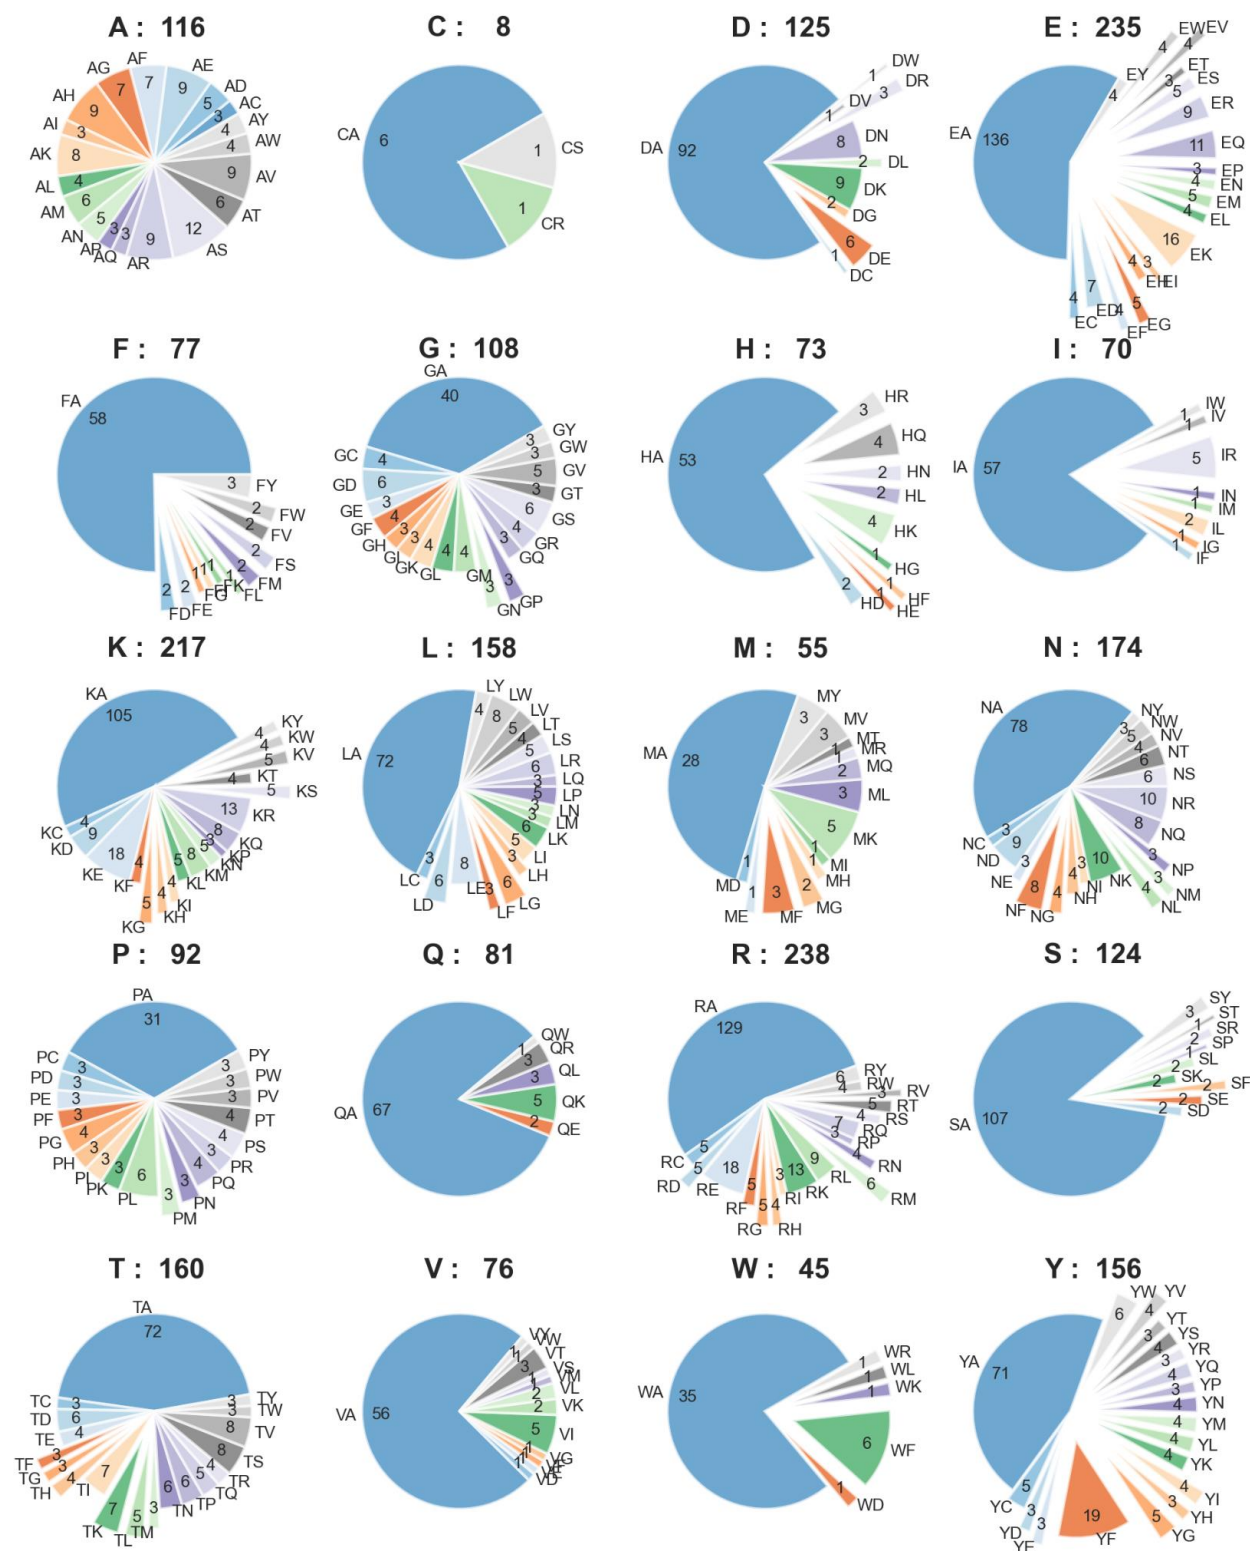

**Figure S1d.** Pie-chart summarizing count of different amino acid mutations in SKEMPI-SEQ-2388. In each subplot, the title shows the wild-type amino acids followed by their count in the whole dataset, and the two-letter label of every pie denotes the one-letter codes of the wild-type and mutant amino acid pair respectively.

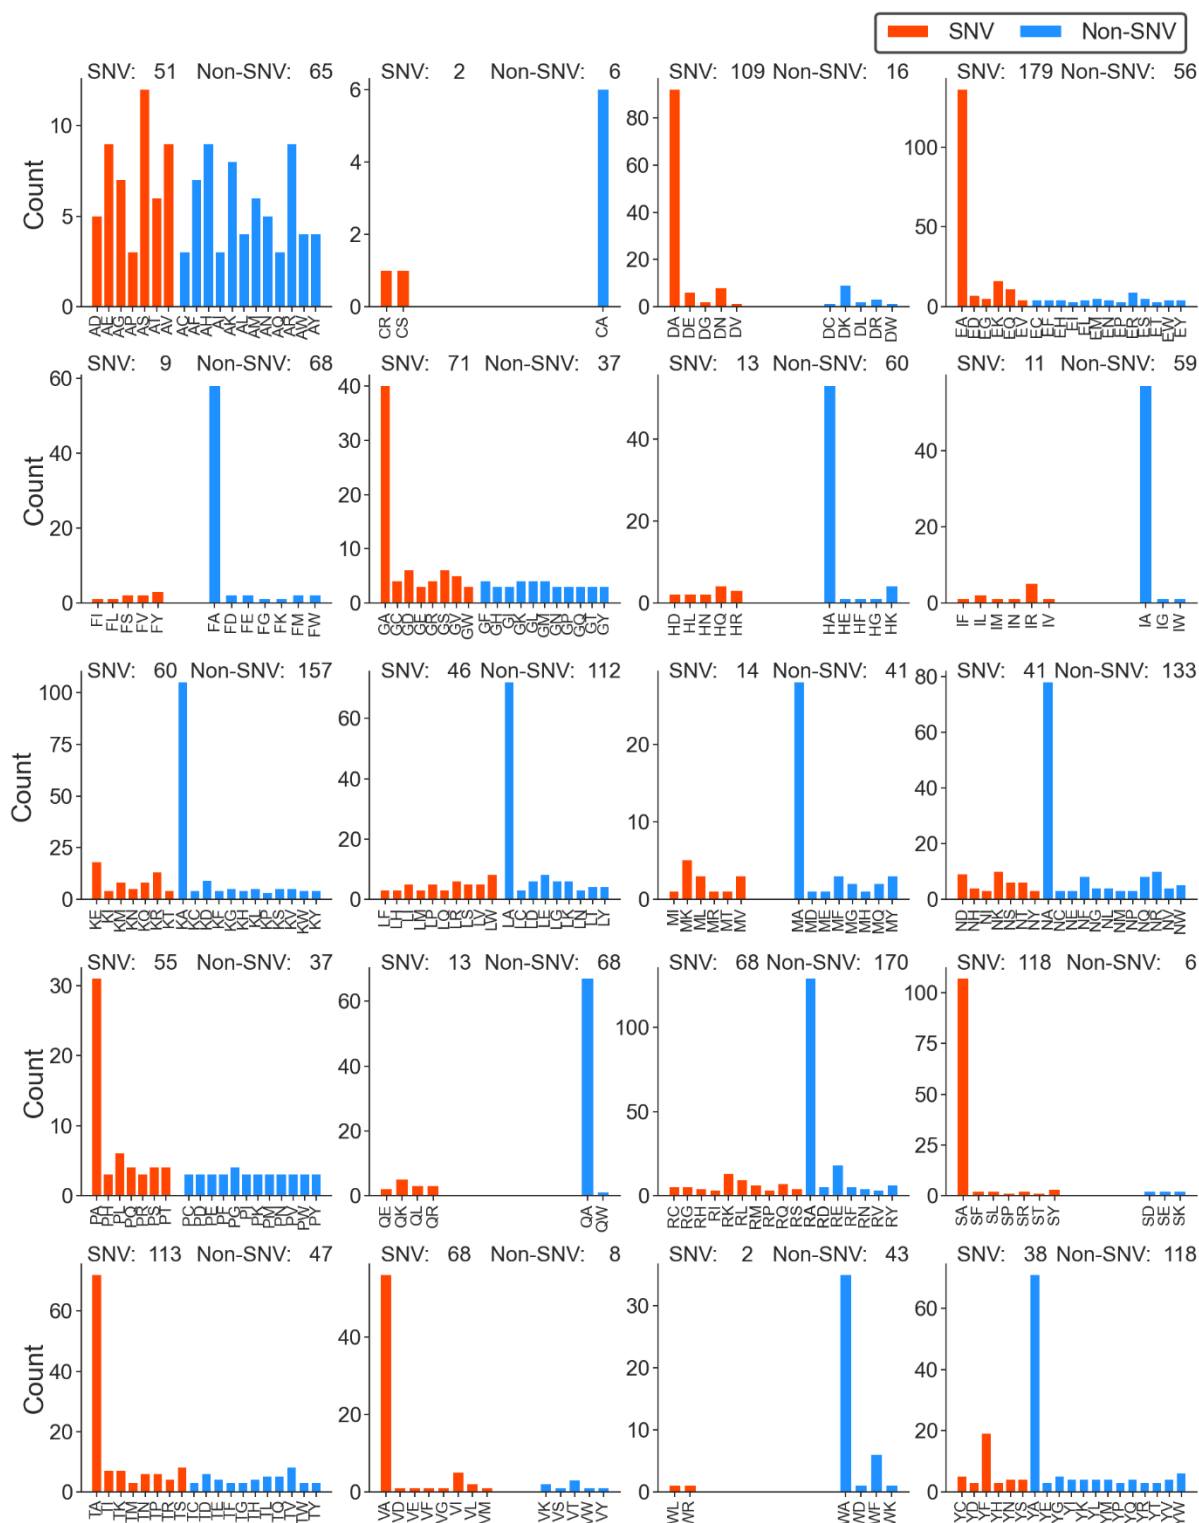

**Figure S1e.** Bar plot summarizing count of SNV and non-SNV mutations in SKEMPI-SEQ-2388 dataset. The two-letter label of every bar denotes the one-letter codes of the wild-type and mutant amino acid pairs, respectively.

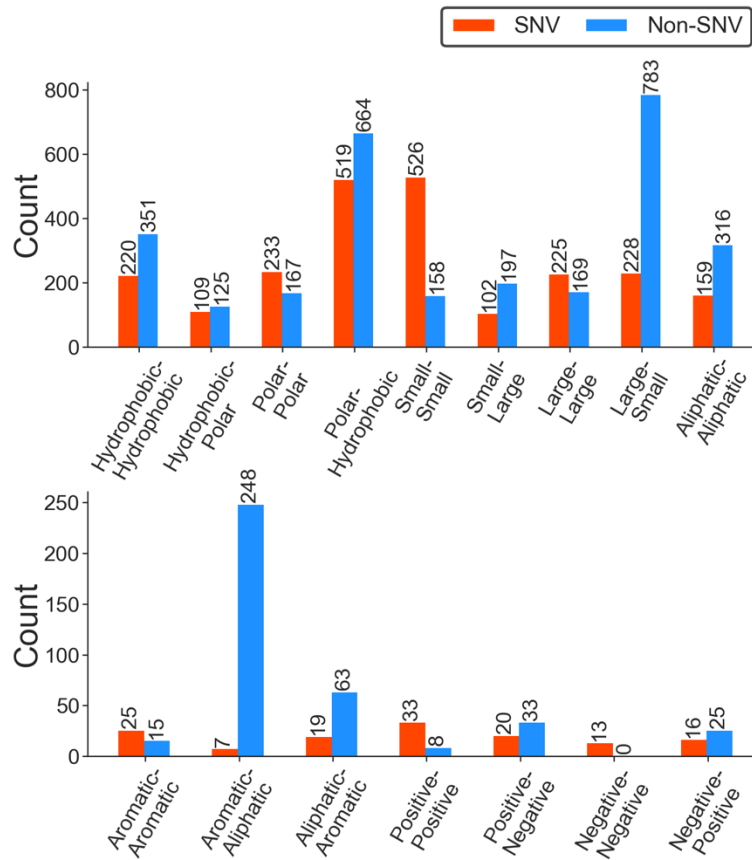

**Figure S1f.** SNV vs non-SNV mutations is assigned according to the type of amino acid mutation in the SKEMPI-SEQ-2388 dataset. The two-word label of bars in the plot represents the amino acid properties of wild-type and mutant residues pairs, respectively. The amino acids according to their properties are categorized as follows: Ala, Cys, Gly, Ile, Leu, Met, Phe, Pro, Trp, and Val are categorized as hydrophobic. Asp, Glu, Lys, Arg, His, Asn, Gln, Ser, Thr, and Tyr are categorized as polar. His, Phe, Trp, and Tyr as aromatic. Ala, Ile, Lys, Leu, Met, Pro, and Val as aliphatic. His, Lys, Arg as positive. Asp, and Glu as negative. Ala, Cys, Gly, Ser, Asn, Asp, Pro, Thr, and Val as small. And Arg, Gln, Glu, His, Ile, Leu, Lys, Met, Phe, Trp, and Tyr as large amino acids.



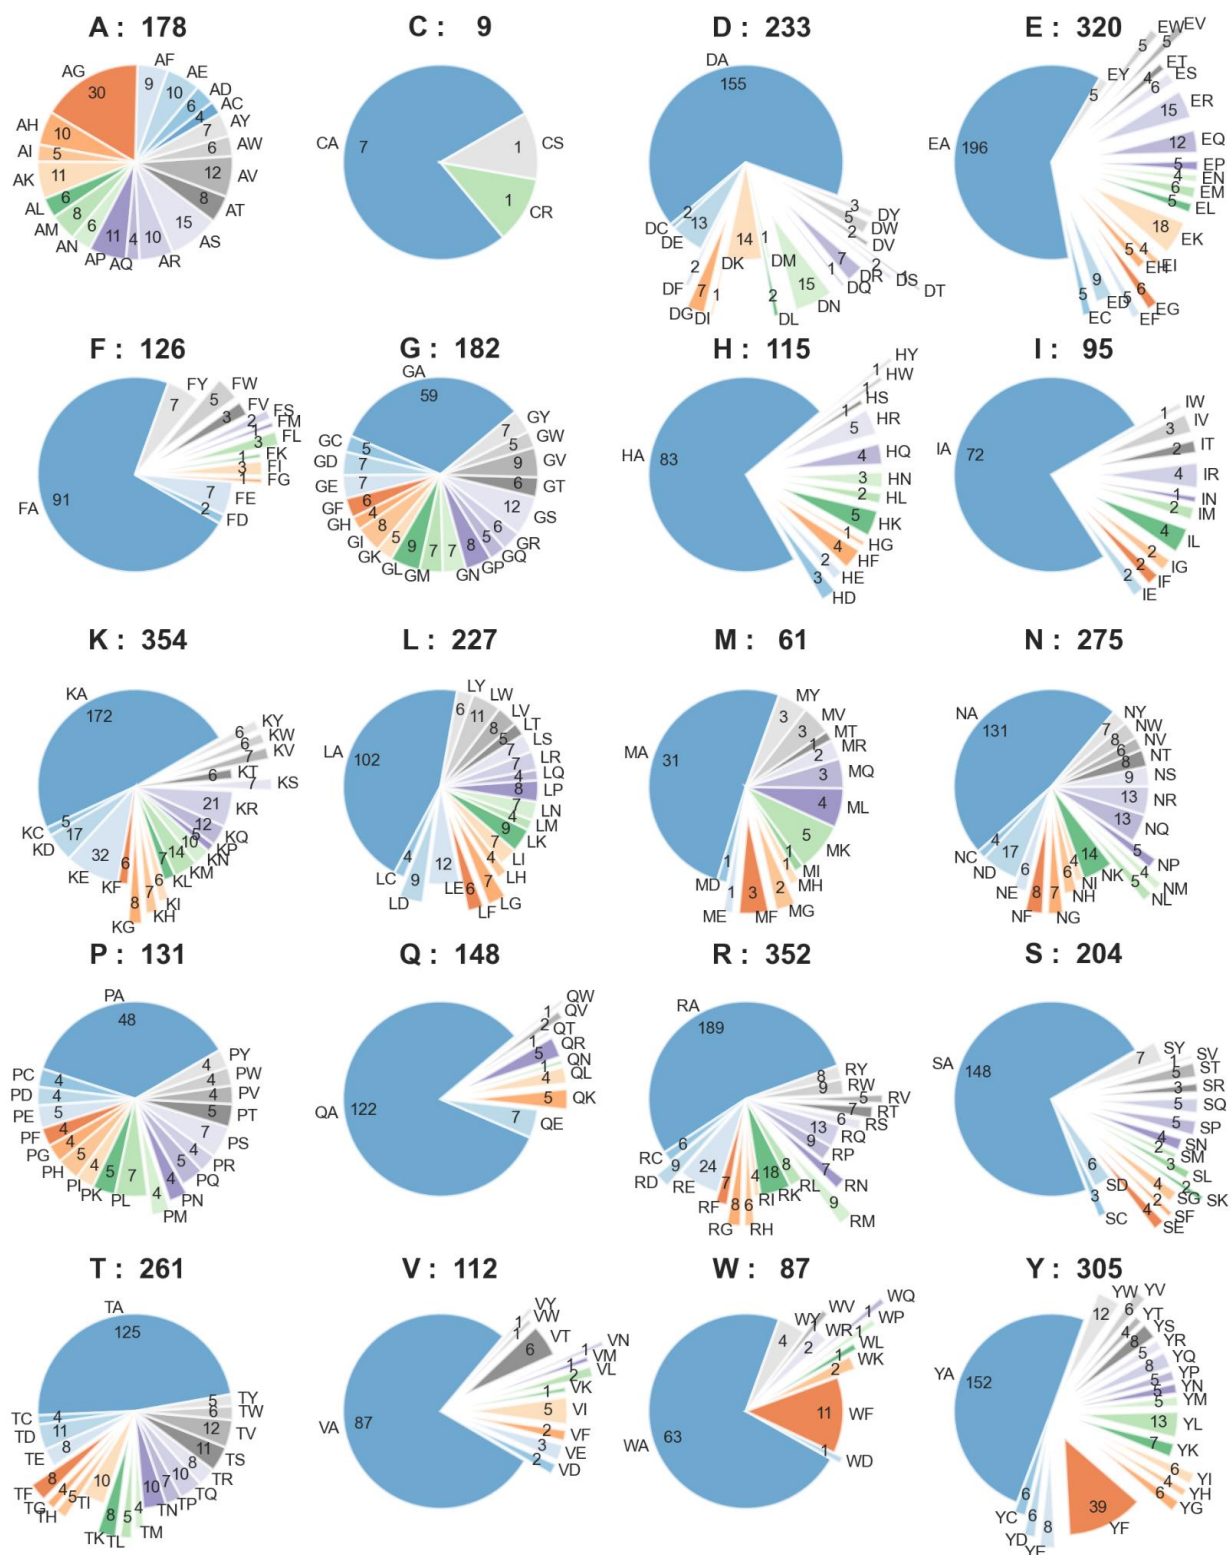

**Figure S1g.** Pie-chart summarizing count of different amino acid mutations in SKEMPI-3D-3775 dataset. In each subplot, the title shows the wild-type amino acids followed by their count in the whole dataset, and the two-letter label of every pie denotes the one-letter codes of the wild-type and mutant amino acid pair respectively.





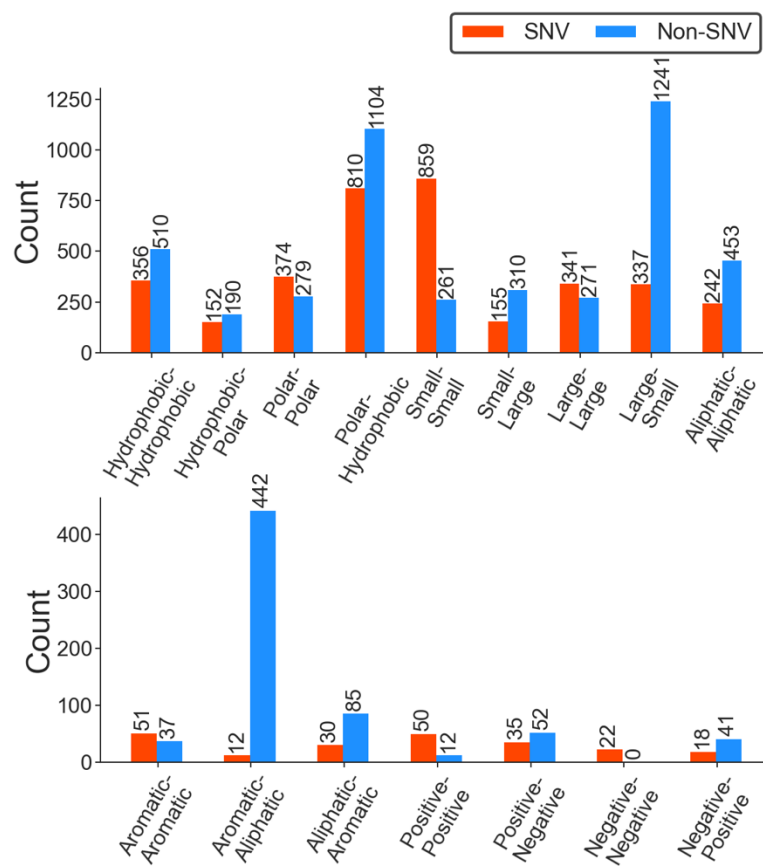

**Figure S1i.** SNV *vs* non-SNV mutations is assigned according to the type of amino acid mutation in the SKEMPI-3D-3775 dataset. The two-word label of bars in the plot represents the amino acid properties of wild-type and mutant residues pairs, respectively. The amino acids according to their properties are categorized as follows: Ala, Cys, Gly, Ile, Leu, Met, Phe, Pro, Trp, and Val are categorized as hydrophobic. Asp, Glu, Lys, Arg, His, Asn, Gln, Ser, Thr, and Tyr are categorized as polar. His, Phe, Trp, and Tyr as aromatic. Ala, Ile, Lys, Leu, Met, Pro, and Val as aliphatic. His, Lys, Arg as positive. Asp, and Glu as negative. Ala, Cys, Gly, Ser, Asn, Asp, Pro, Thr, and Val as small. And Arg, Gln, Glu, His, Ile, Leu, Lys, Met, Phe, Trp, and Tyr as large amino acids.

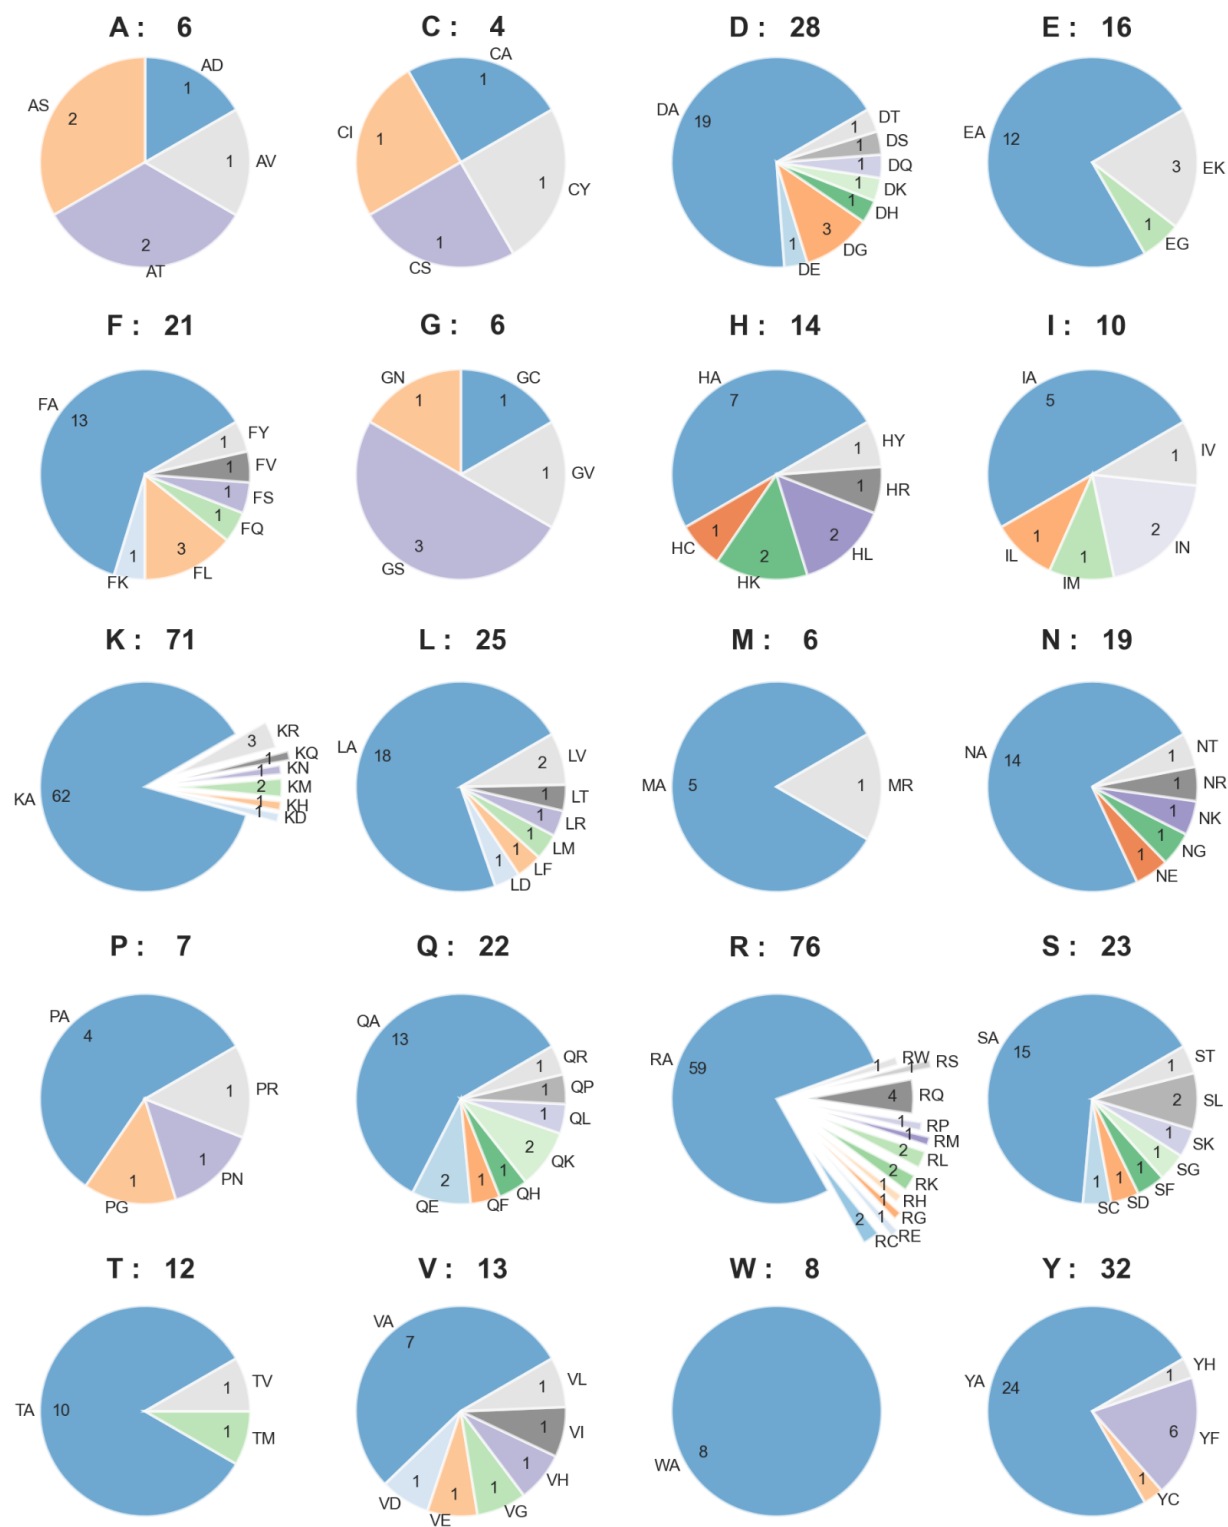

**Figure S1j.** Pie-chart summarizing count of different amino acid mutations in the S419 dataset. In each subplot, the title shows the wild-type amino acids followed by their count in the whole dataset, and the two-letter label of every pie denotes the one-letter codes of the wild-type and mutant amino acid pair respectively.

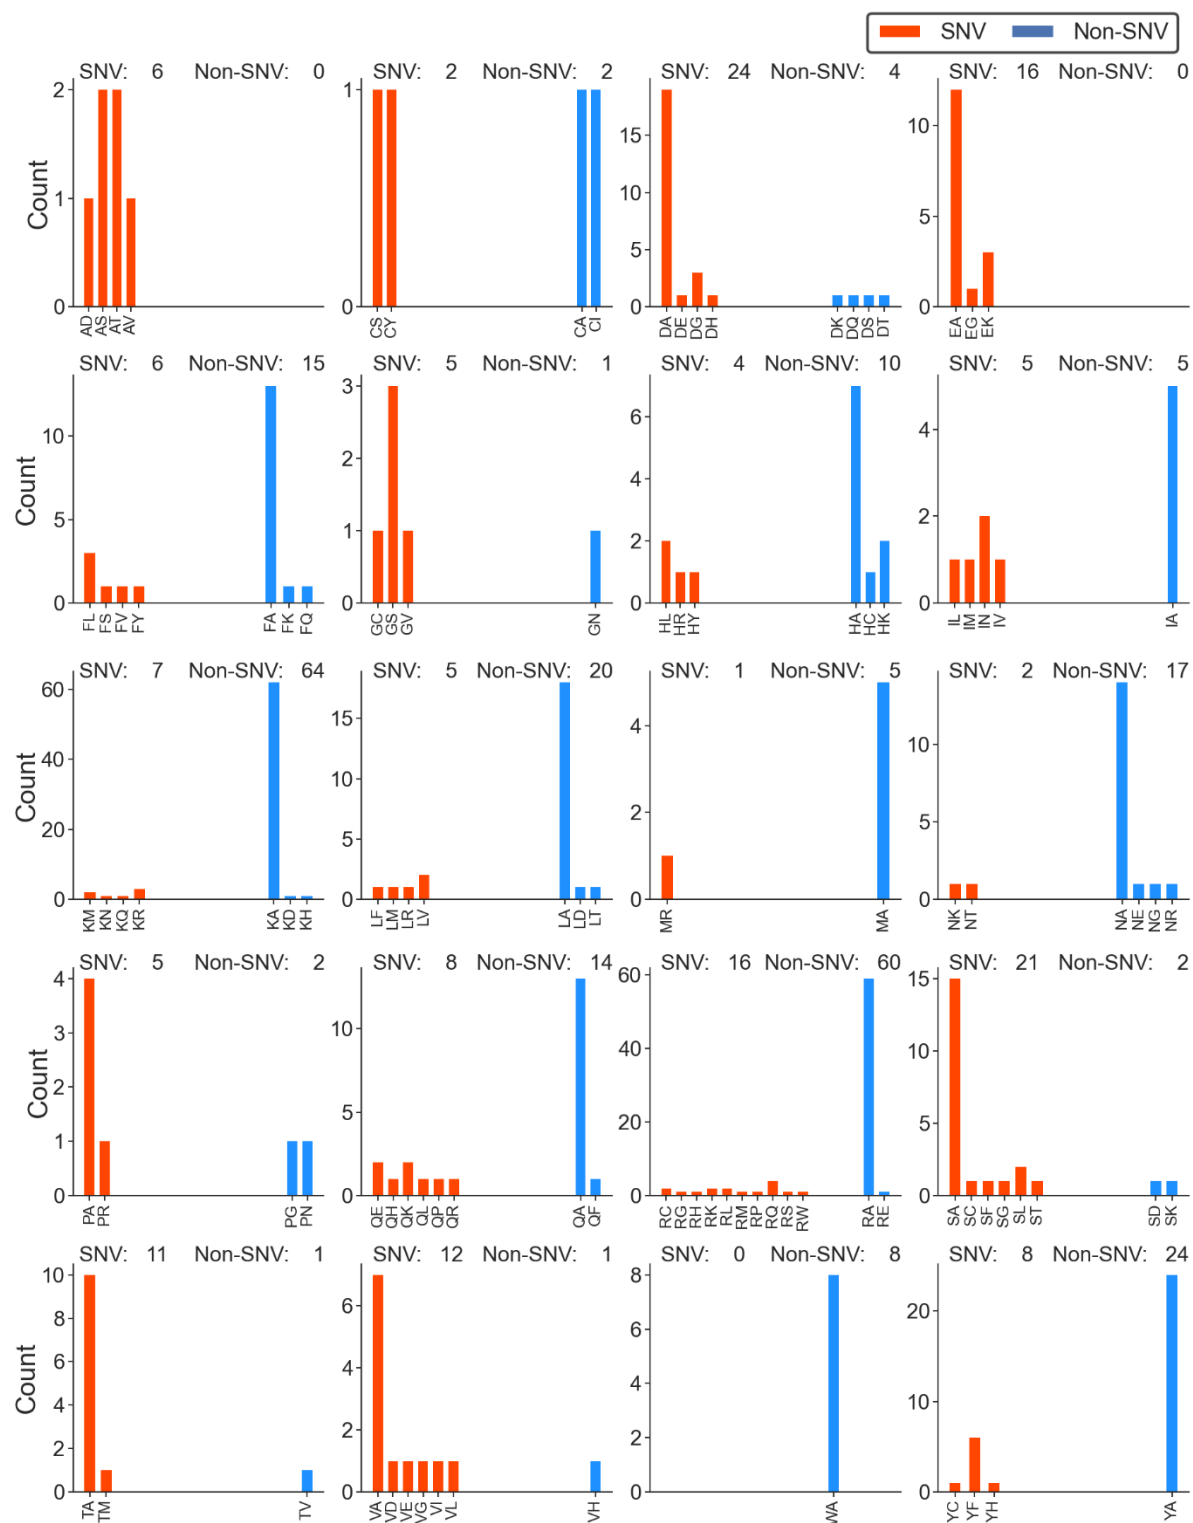

**Figure S1k.** Bar plots summarizing the count of SNV and non-SNV mutations in the S419 dataset. The two-letter label of every bar denotes the one-letter codes of the wild-type and mutant amino acid pairs, respectively.

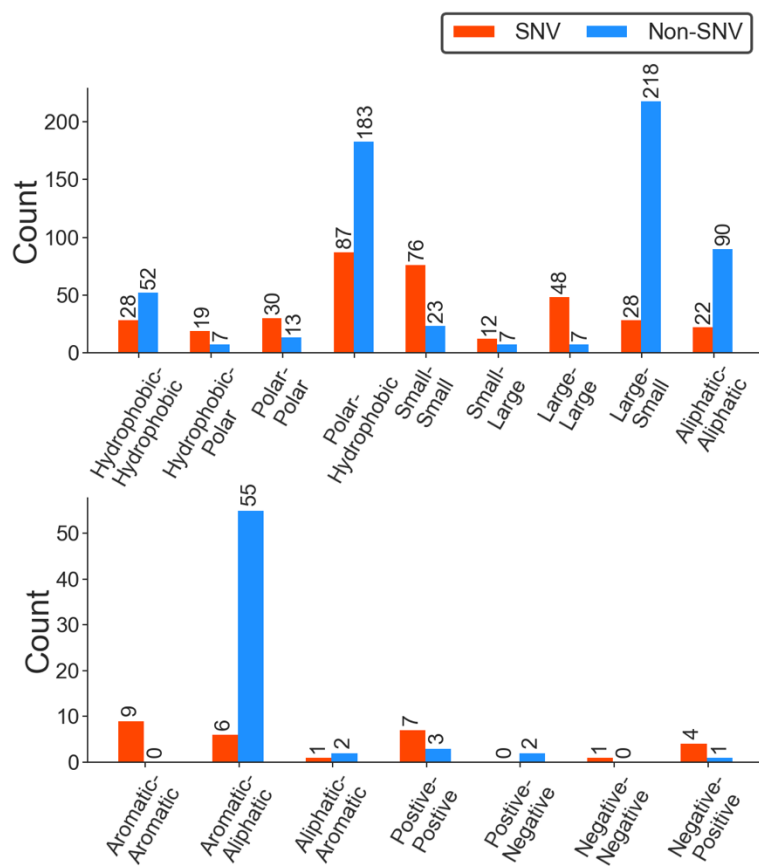

**Figure S11.** SNV vs non-SNV mutations is assigned according to the type of amino acid mutation in the S419 dataset. The two-word label of bars in the plot represents the amino acid properties of wild-type and mutant residues pairs, respectively. The amino acids according to their properties are categorized as follows: Ala, Cys, Gly, Ile, Leu, Met, Phe, Pro, Trp, and Val are categorized as hydrophobic. Asp, Glu, Lys, Arg, His, Asn, Gln, Ser, Thr, and Tyr are categorized as polar. His, Phe, Trp, and Tyr are aromatic. Ala, Ile, Lys, Leu, Met, Pro, and Val as aliphatic. His, Lys, Arg as positive. Asp, and Glu as negative. Ala, Cys, Gly, Ser, Asn, Asp, Pro, Thr, and Val as small. And Arg, Gln, Glu, His, Ile, Leu, Lys, Met, Phe, Trp, and Tyr as large amino acids.

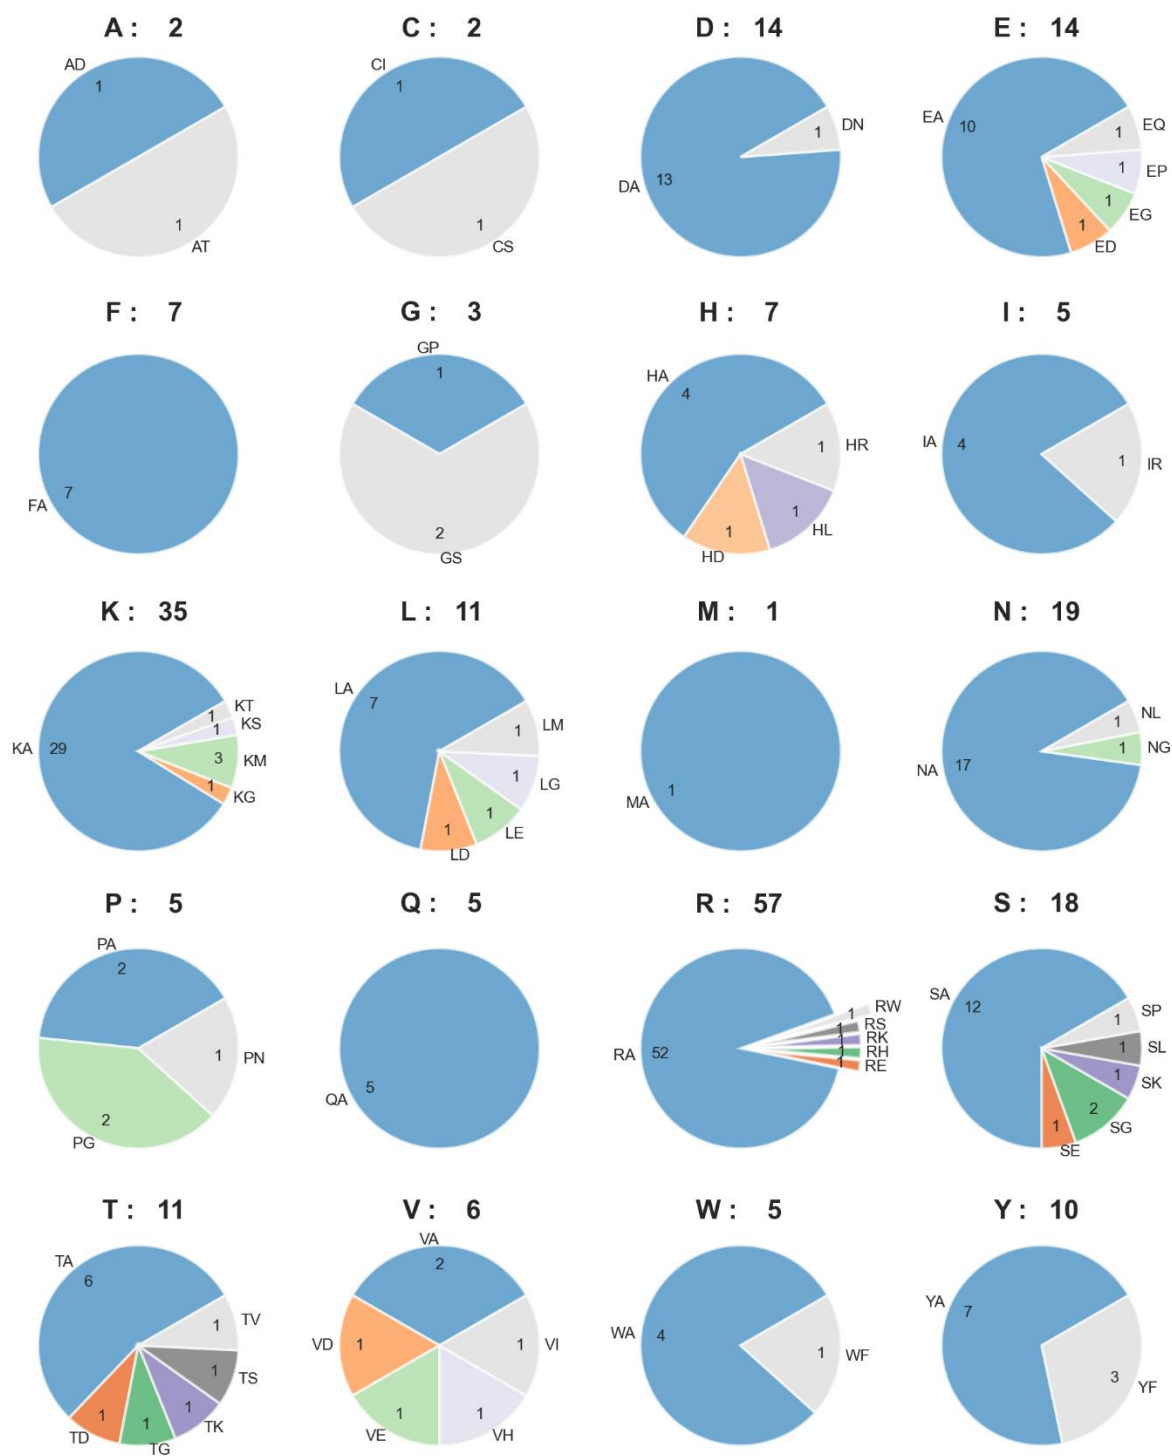

**Figure S1m:** Pie-chart summarizing count of different amino acid mutations in ProNAB-237. In each subplot, the title shows the wild-type amino acids followed by their count in the whole dataset, and the two-letter label of every pie denotes the one-letter codes of the wild-type and mutant amino acid pair respectively.



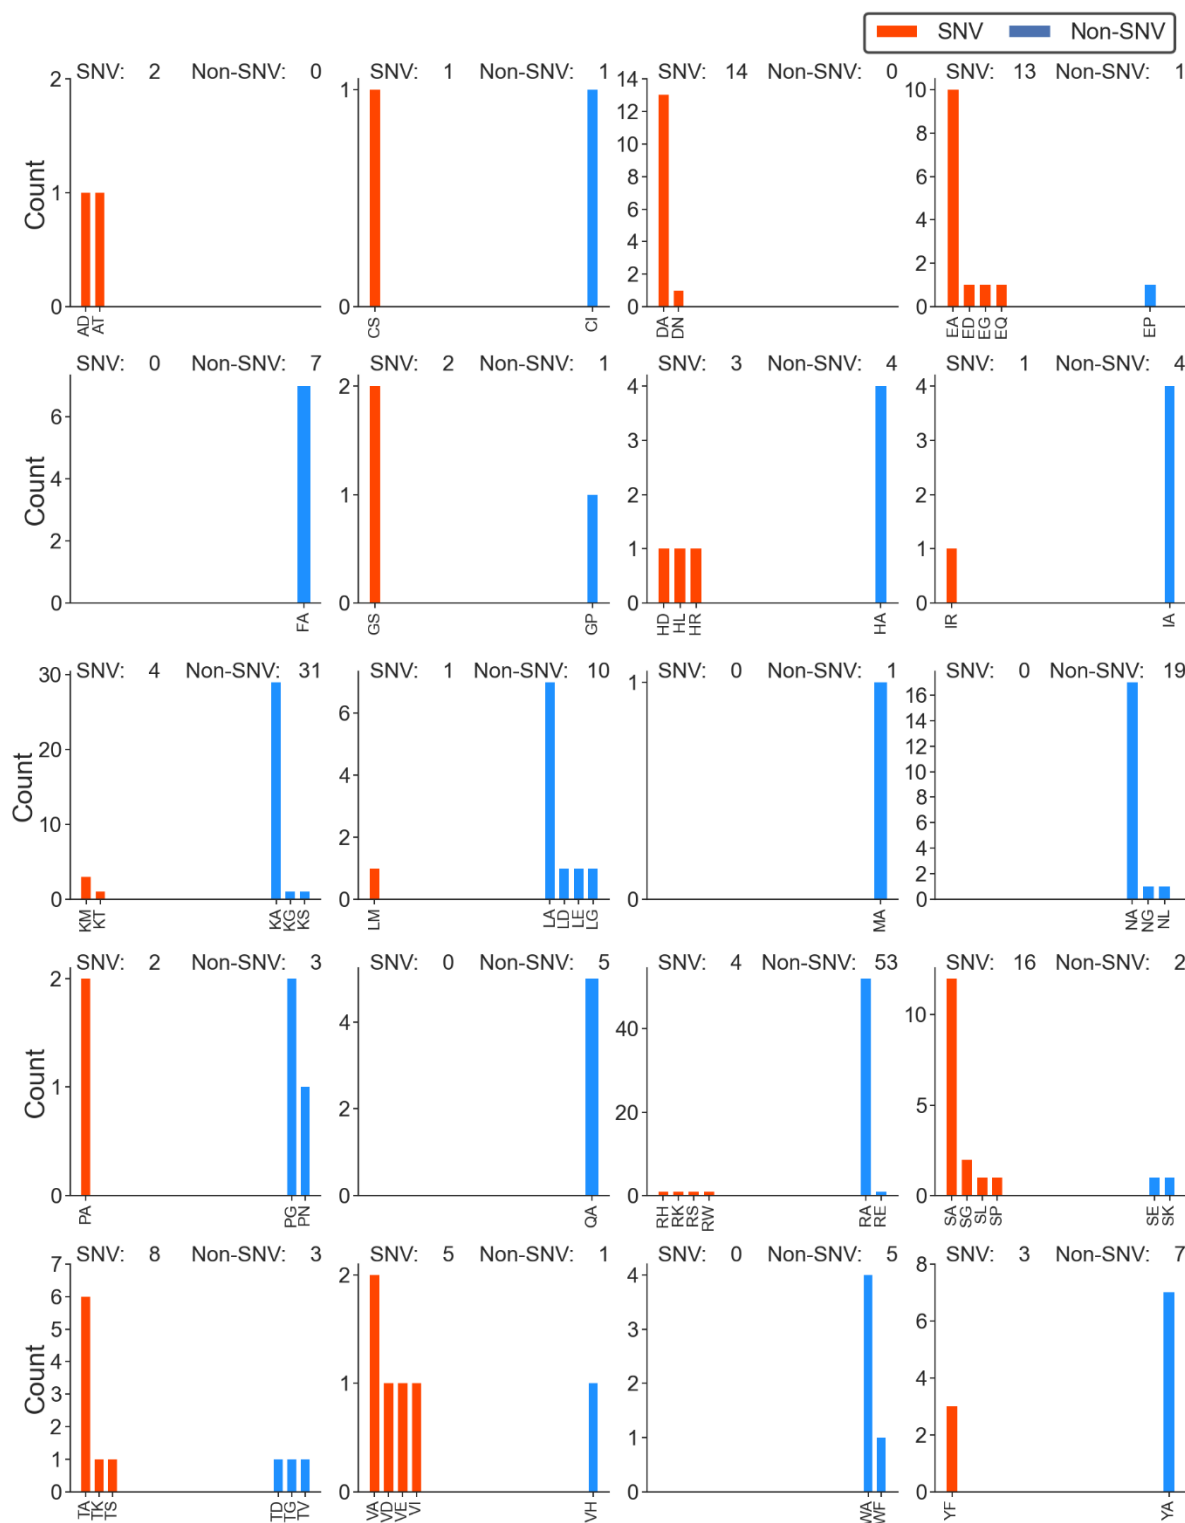

**Figure S1n.** Bar plots summarizing the count of SNV and non-SNV mutations in the ProNAB-237 dataset. The two-letter label of every bar denotes the one-letter codes of the wild-type and mutant amino acid pairs, respectively.

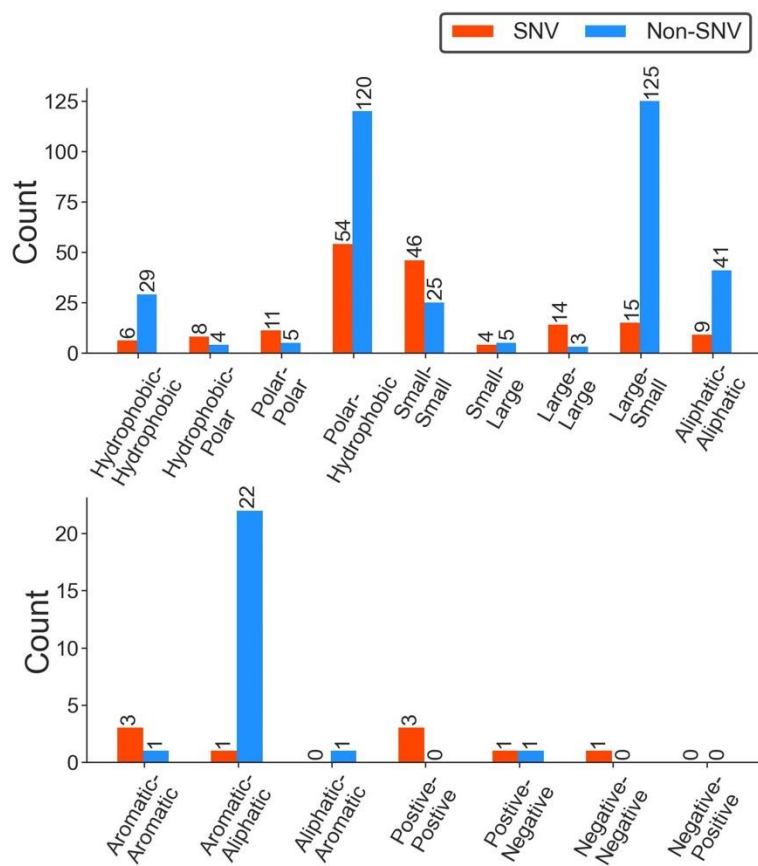

**Figure S10.** SNV vs non-SNV mutations is assigned according to the type of amino acid mutation in the ProNAB-237 dataset. The two-word label of bars in the plot represents the amino acid properties of wild-type and mutant residues pairs, respectively. The amino acids according to their properties are categorized as follows: Ala, Cys, Gly, Ile, Leu, Met, Phe, Pro, Trp, and Val are categorized as hydrophobic. Asp, Glu, Lys, Arg, His, Asn, Gln, Ser, Thr, and Tyr are categorized as polar. His, Phe, Trp, and Tyr as aromatic. Ala, Ile, Lys, Leu, Met, Pro, and Val as aliphatic. His, Lys, Arg as positive. Asp, and Glu as negative. Ala, Cys, Gly, Ser, Asn, Asp, Pro, Thr, and Val as small. And Arg, Gln, Glu, His, Ile, Leu, Lys, Met, Phe, Trp, and Tyr as large amino acids.

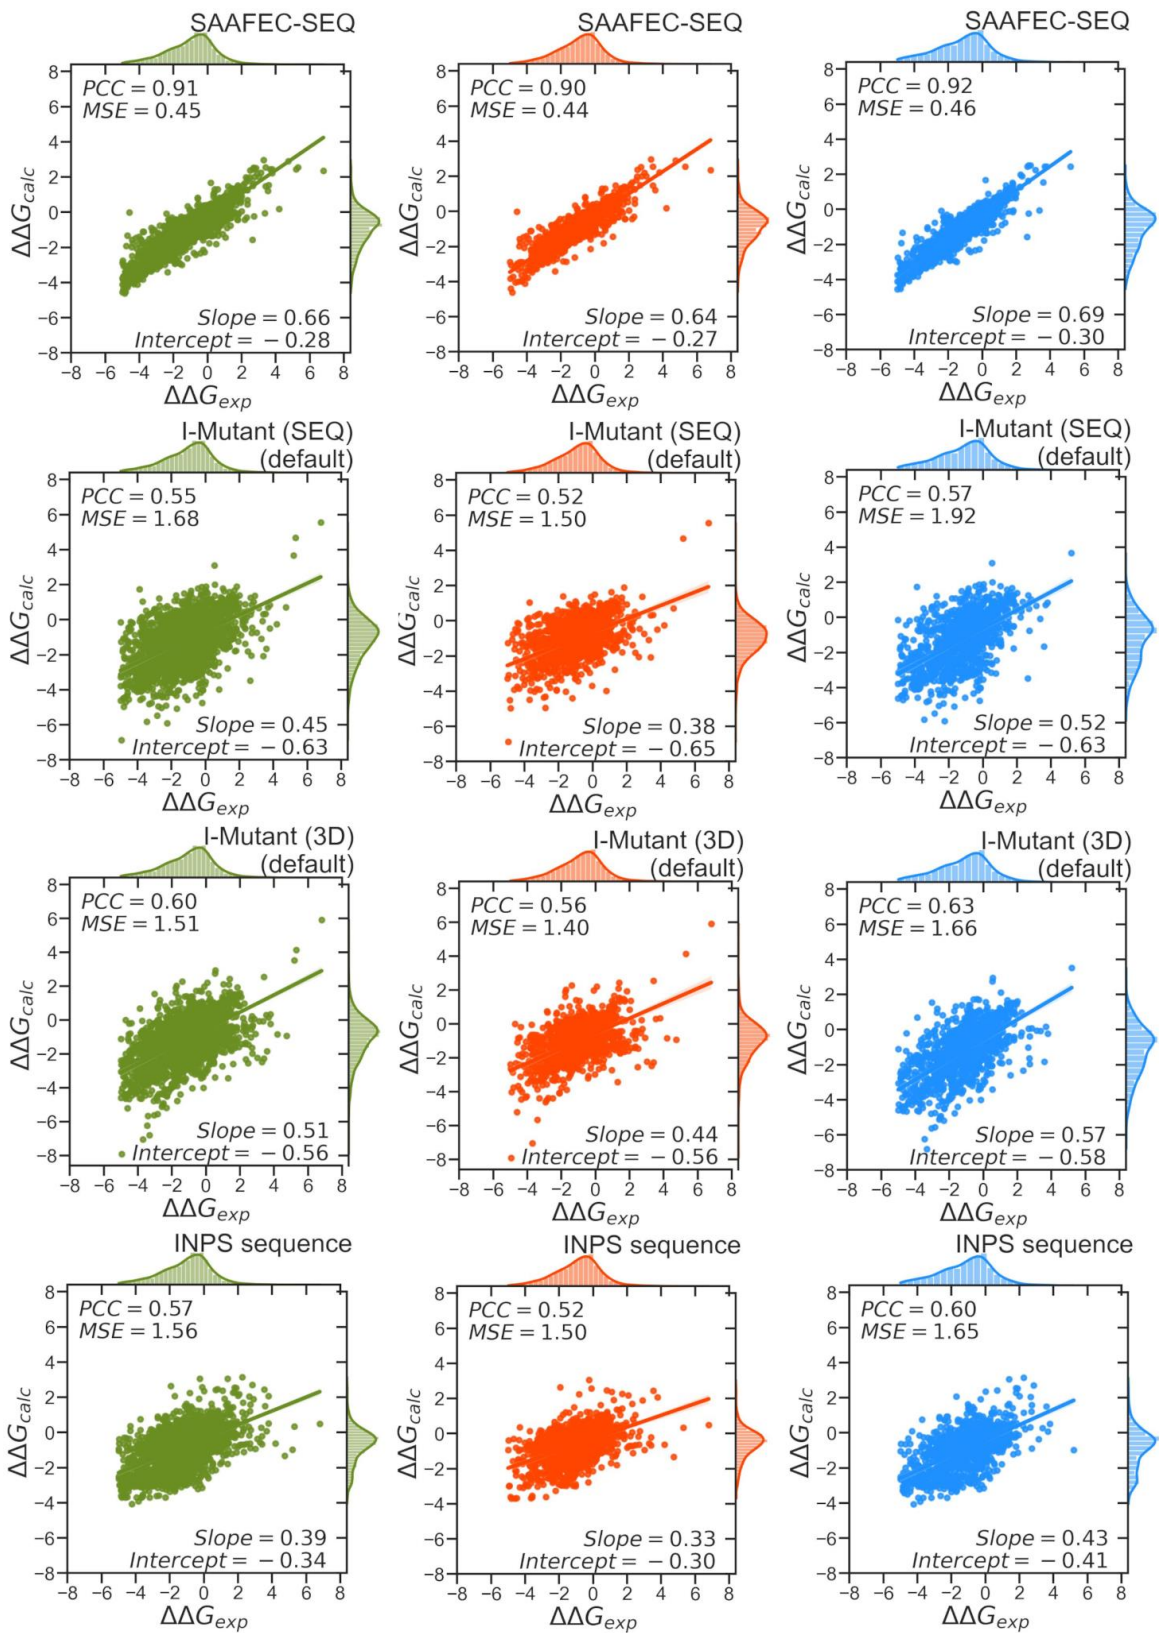

**Figure S2a.** Plots of predicted  $\Delta\Delta G$  against experimental  $\Delta\Delta G$  for the S2648 dataset. The whole data is shown in green, SNV in red, and non-SNV in blue.

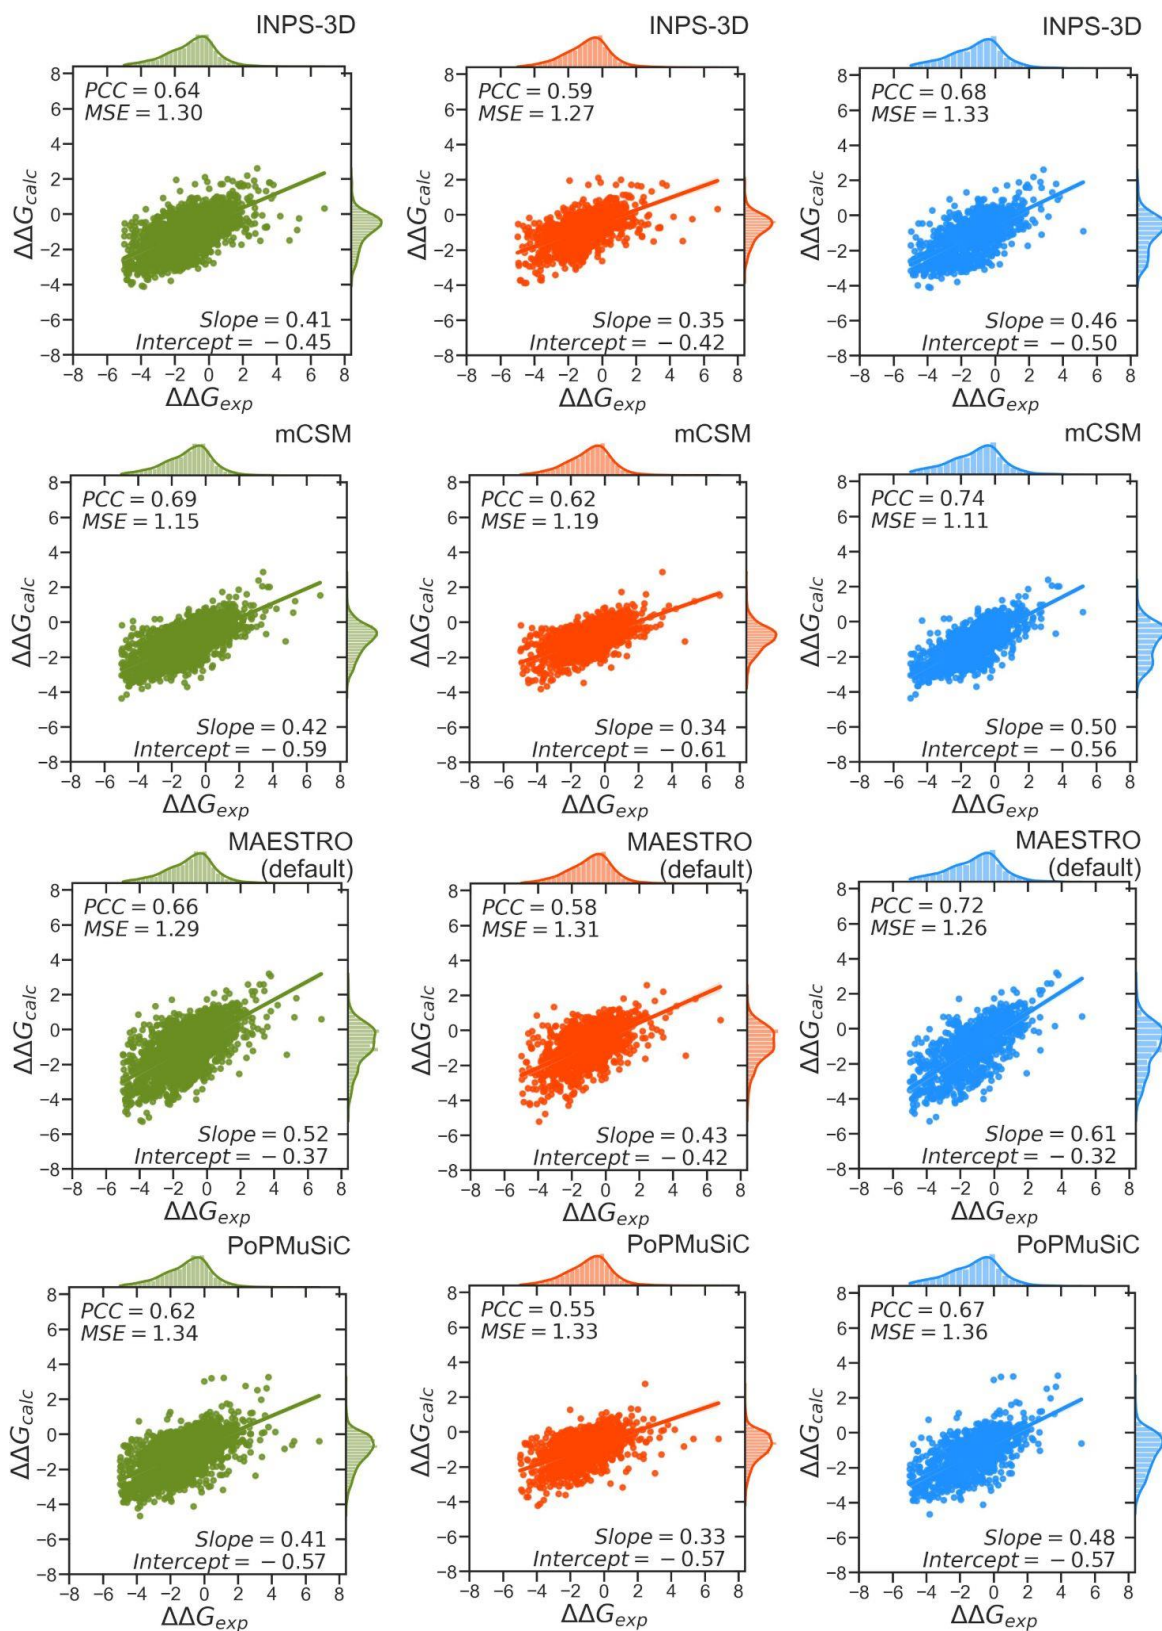

**Figure S2b.** Plots of predicted  $\Delta\Delta G$  against experimental  $\Delta\Delta G$  for the S2648 dataset. The whole data is shown in green, SNV in red, and non-SNV in blue.

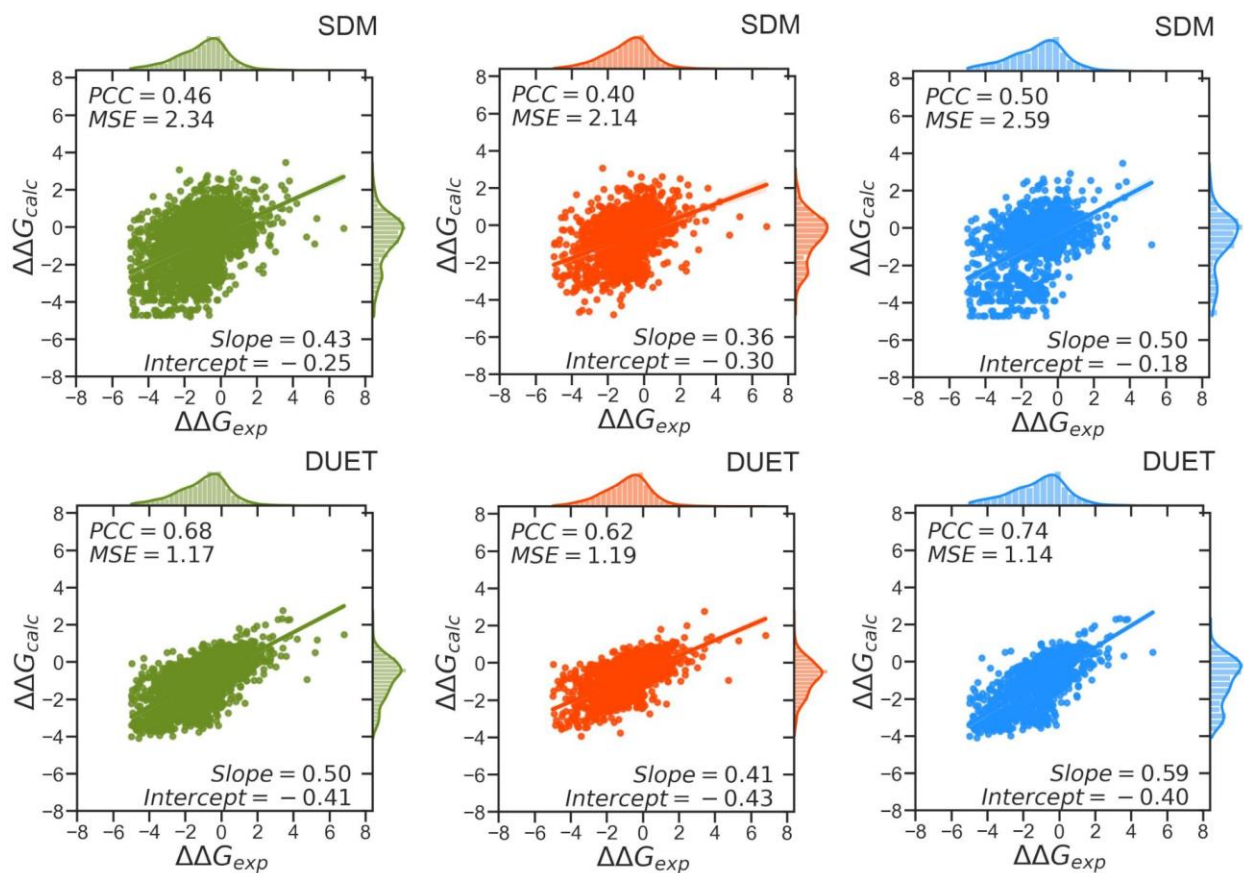

**Figure S2c.** Plots of predicted  $\Delta\Delta G$  against experimental  $\Delta\Delta G$  for the S2648 dataset. The whole data is shown in green, SNV in red, and non-SNV in blue.



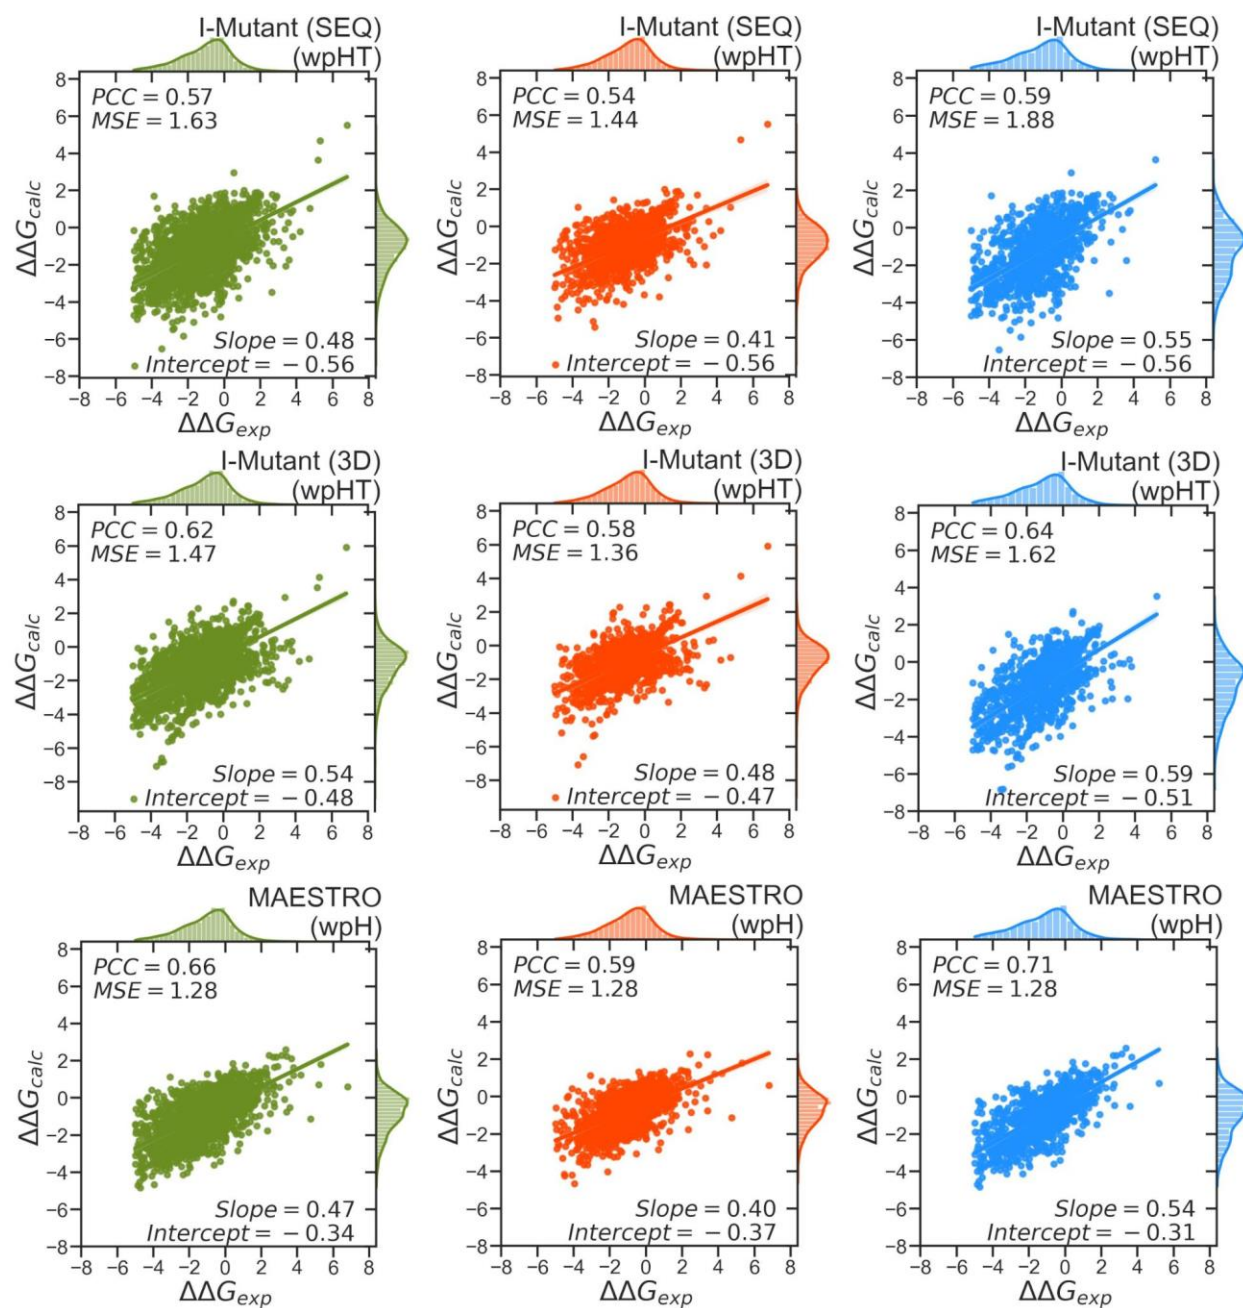

**Figure S2d.** Plots of predicted  $\Delta\Delta G$  against experimental  $\Delta\Delta G$  for the S2648 dataset. The whole data is shown in green, SNV in red, and non-SNV in blue. wpHT : the calculations have been performed using experimental pH and temperature and wpH : the calculations have been performed using experimental pH.



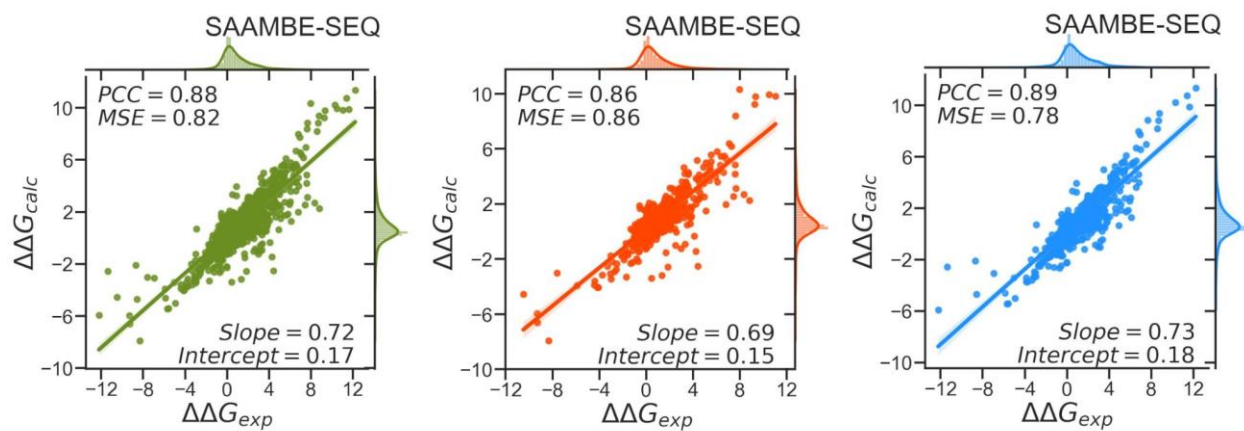

**Figure S3a.** Plots of predicted  $\Delta\Delta G$  against experimental  $\Delta\Delta G$  for the SKEMPI-SEQ-2388 dataset. The whole data is shown in green, SNV in red, and non-SNV in blue.

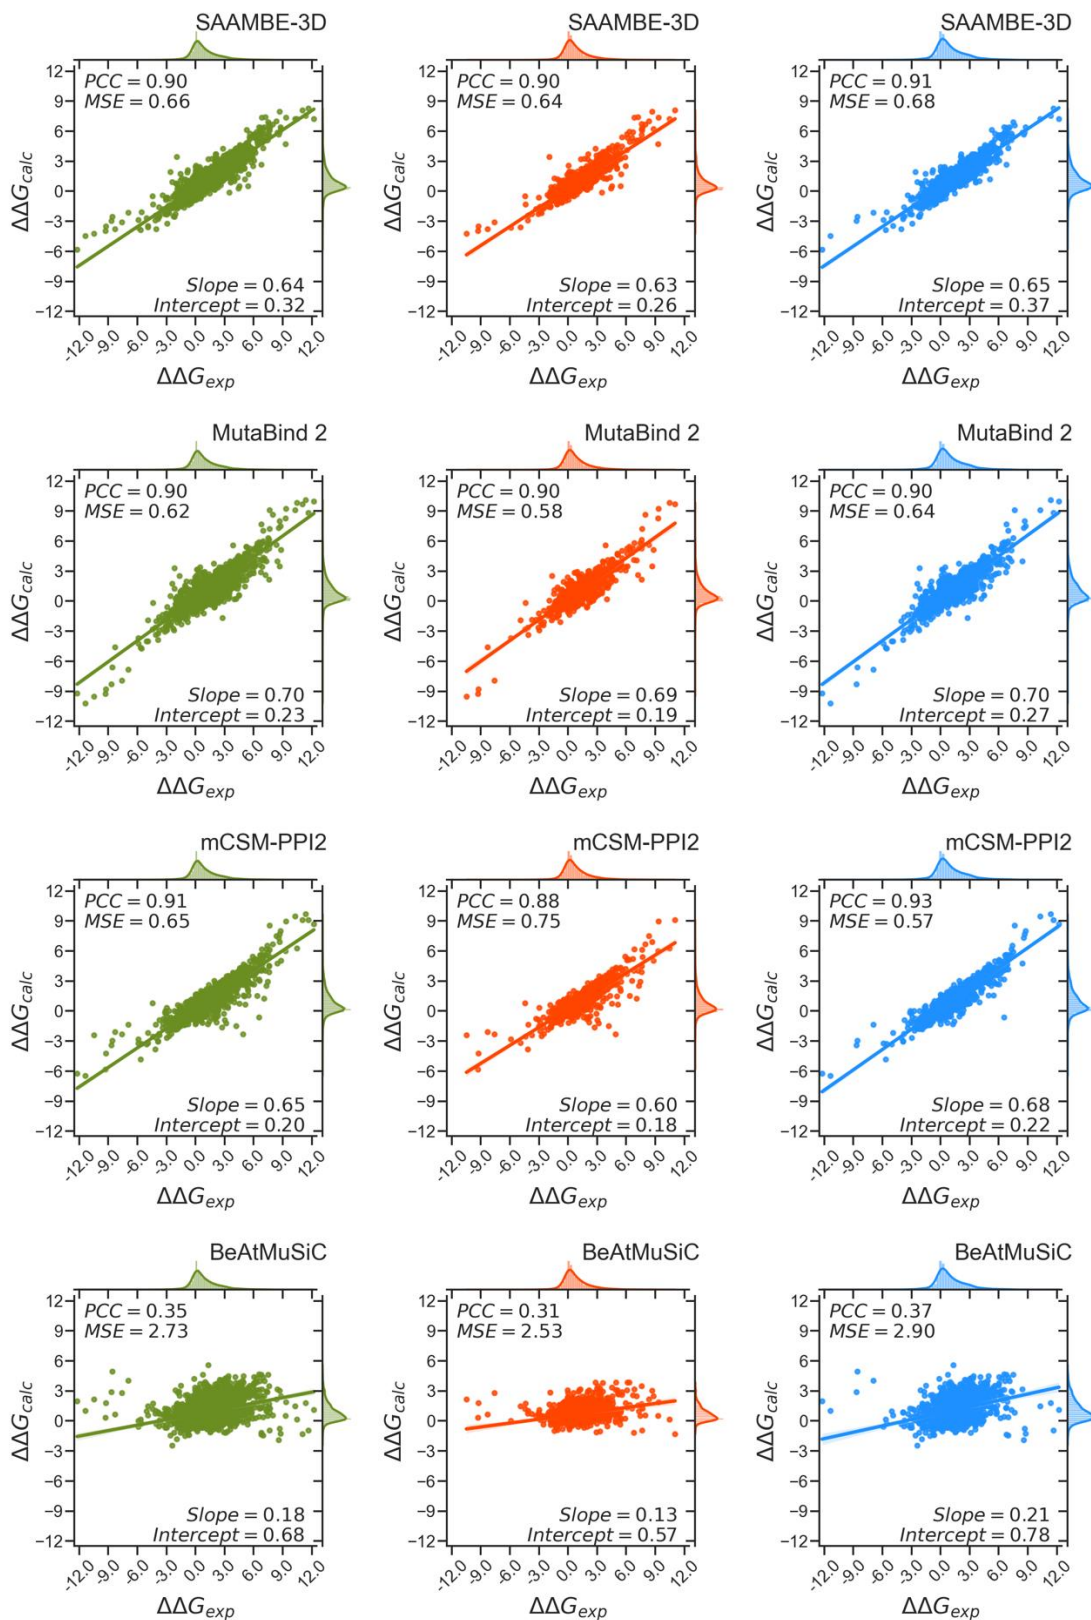

**Figure S3b.** Plots of predicted  $\Delta\Delta G$  against experimental  $\Delta\Delta G$  for the SKEMPI-3D-3775 dataset. The whole data is shown in green, SNV in red, and non-SNV in blue.

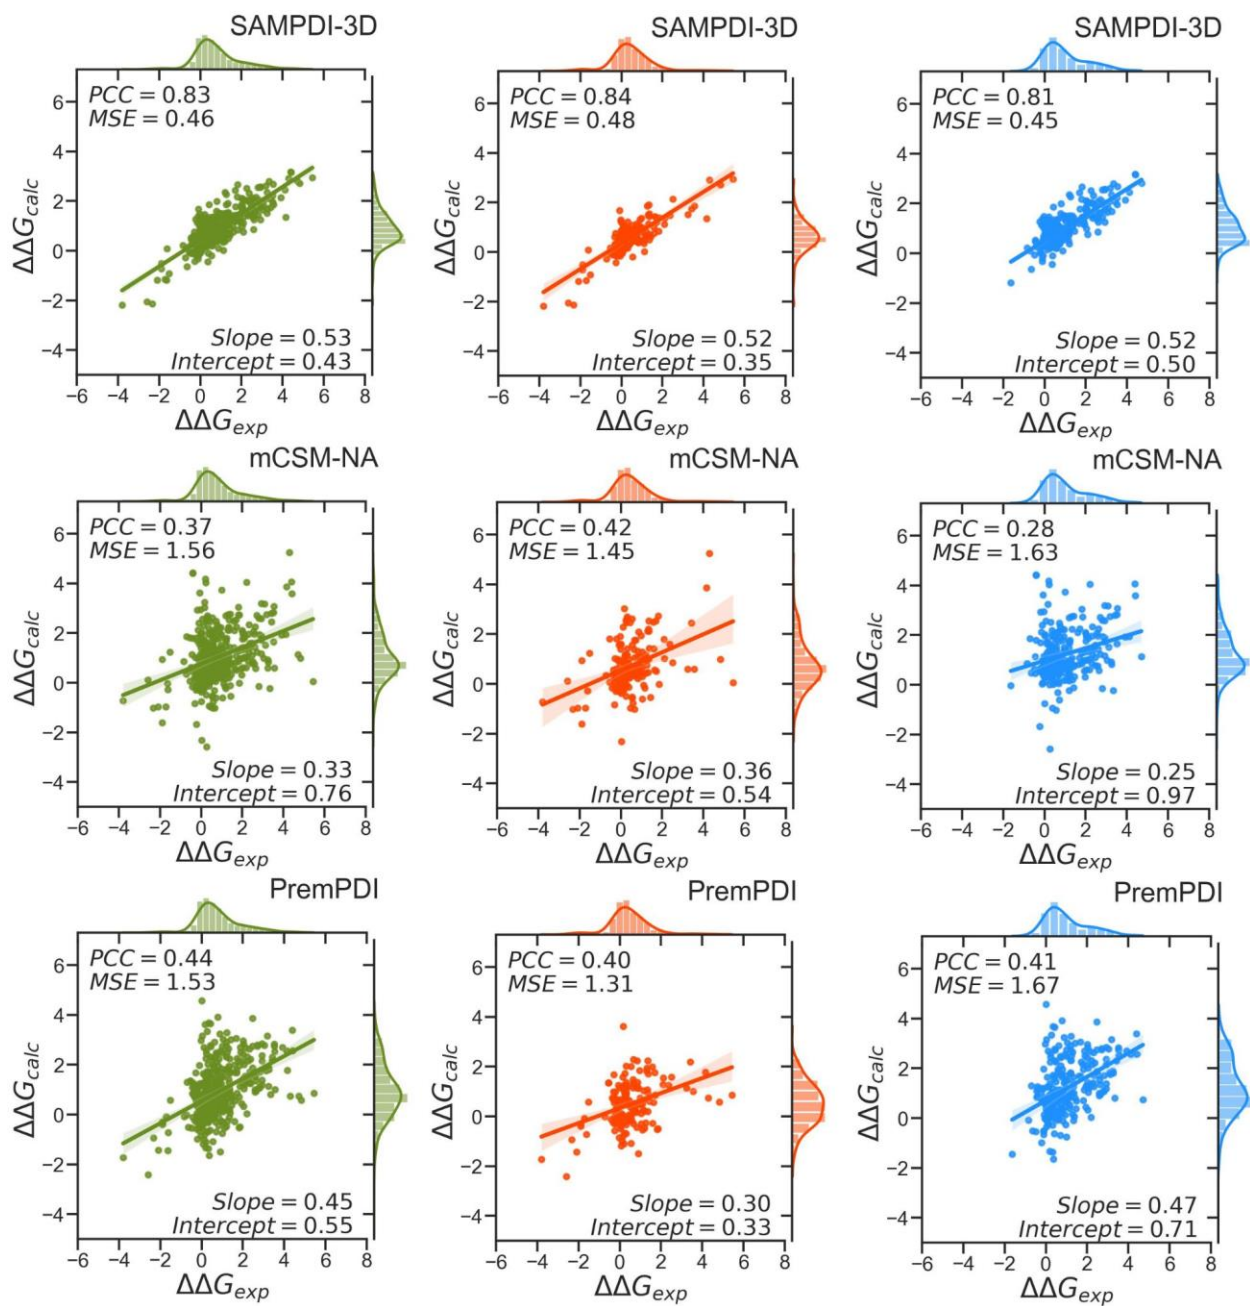

**Figure S4a.** Plots of predicted  $\Delta\Delta G$  against experimental  $\Delta\Delta G$  for the S419 dataset. The whole data is shown in green, SNV in red, and non-SNV in blue.

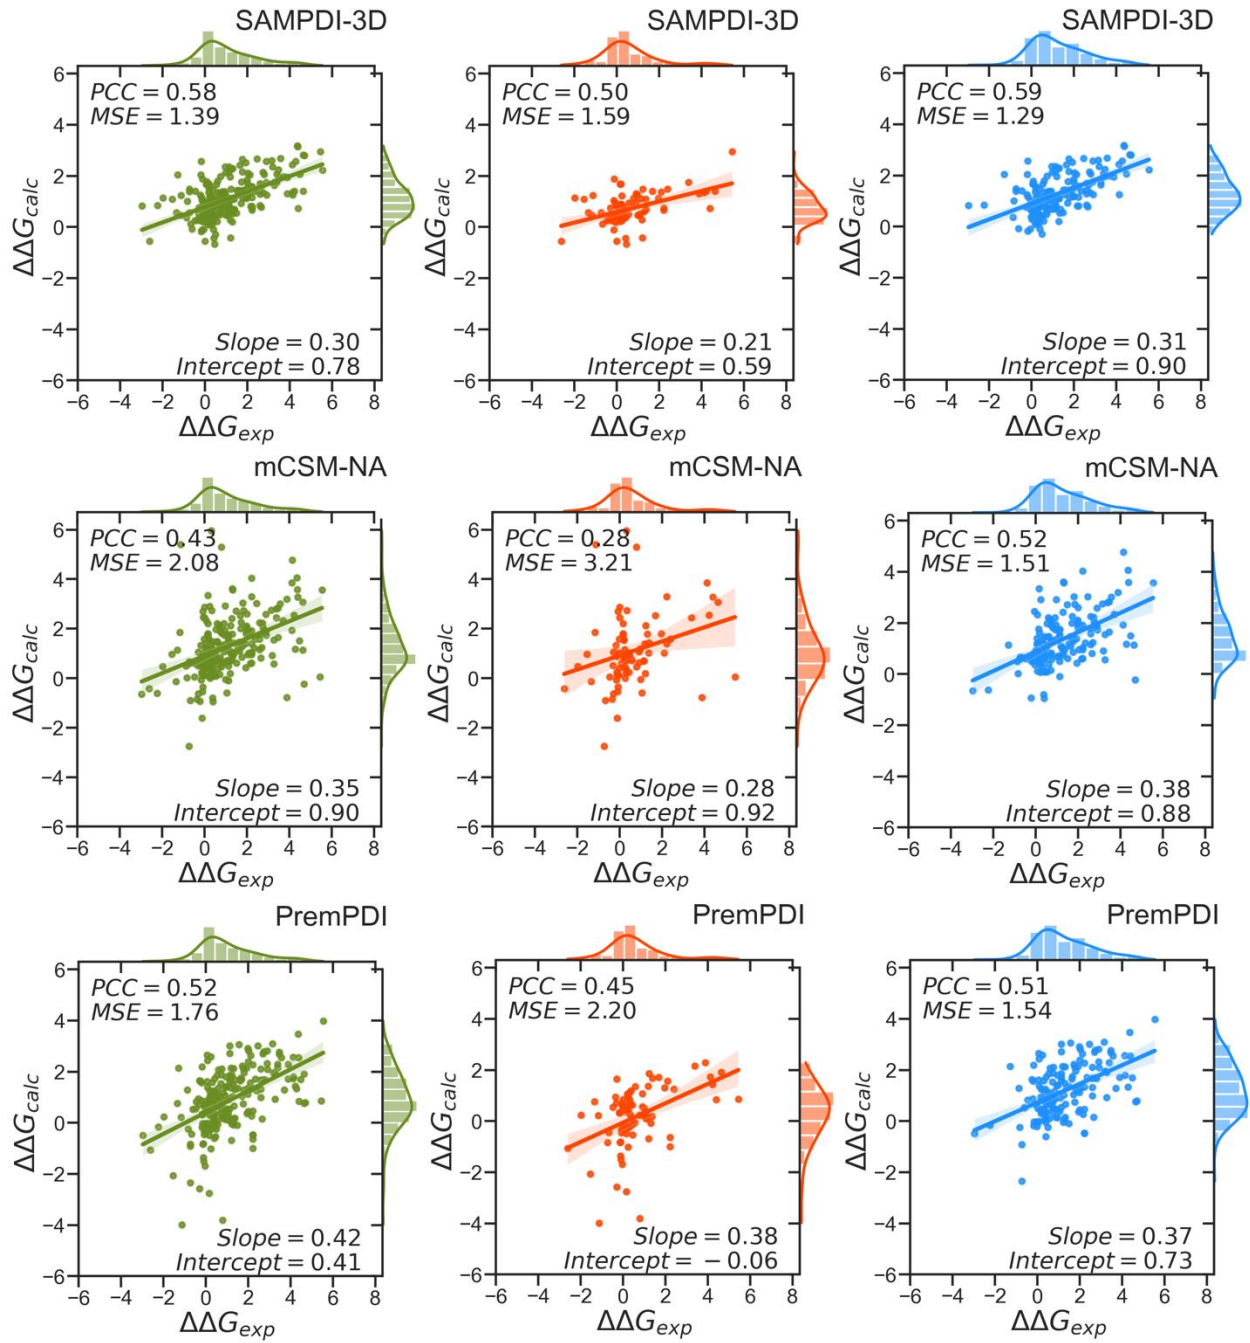

**Figure S4b.** Plots of predicted  $\Delta\Delta G$  against experimental  $\Delta\Delta G$  for the ProNAB-237 dataset. The whole data is shown in green, SNV in red, and non-SNV in blue.

|                  |   | Second Nucleotide                |                              |                                        |                                       |   |                  |
|------------------|---|----------------------------------|------------------------------|----------------------------------------|---------------------------------------|---|------------------|
|                  |   | U                                | C                            | A                                      | G                                     |   |                  |
| First Nucleotide | U | UUU Phe<br>UUC<br>UUA Leu<br>UUG | UCU<br>UCC Ser<br>UCA<br>UCG | UAU Tyr<br>UAC<br>UAA STOP<br>UAG STOP | UGU Cys<br>UGC<br>UGA STOP<br>UGG Trp | U | Third Nucleotide |
|                  | C | CUU<br>CUC Leu<br>CUA<br>CUG     | CCU<br>CCC Pro<br>CCA<br>CCG | CAU His<br>CAC<br>CAA Gln<br>CAG       | CGU<br>CGC Arg<br>CAA<br>CAG          | U |                  |
|                  | A | AUU<br>AUC Ile<br>AUA<br>AUG Met | ACU<br>ACC Thr<br>ACA<br>ACG | AAU Asn<br>AAC<br>AAA Lys<br>AAG       | AGU Ser<br>AGC<br>AGA Arg<br>AGG      | U |                  |
|                  | G | GUU<br>GUC Val<br>GUA<br>GUG     | GCU<br>GCC Ala<br>GCA<br>GCG | GAU Asp<br>GAC<br>GAA Glu<br>GAG       | GGU<br>GGC Gly<br>GGA<br>GGG          | U |                  |

Figure S5a. Universal genetic code.

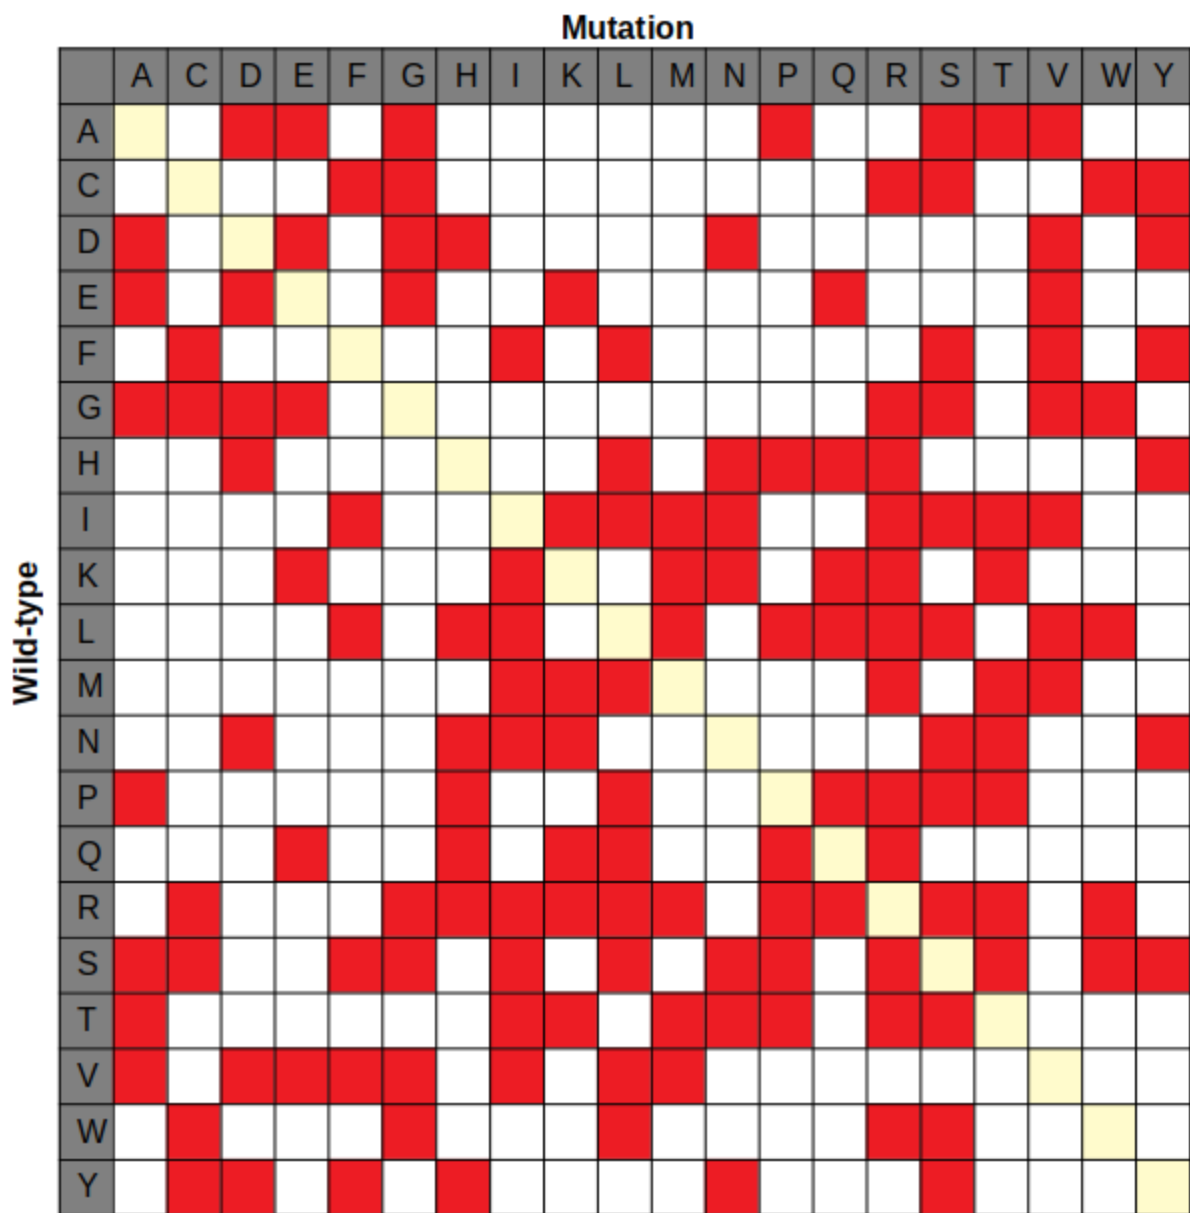

**Figure S5b.** Heat map showing SNV and non-SNV amino acid mutations. Red boxes indicate cases of SNVs and white cases of non-SNVs.



## Supplementary Tables

**Table S1.** Number of SNV and non-SNV cases in the datasets.

| Dataset         | Total | SNV  | Non-SNV |
|-----------------|-------|------|---------|
| S2648           | 2647  | 1493 | 1154    |
| SKEMPI-SEQ-2388 | 2388  | 1081 | 1307    |
| SKEMPI-3D-3775  | 3775  | 1692 | 2083    |
| S419            | 419   | 164  | 255     |
| ProNAB-237      | 237   | 79   | 158     |
